# Supplementary material for: Enhancing the efficiency of opto-electronic devices by the cathode modification
Source: Royal Society of Chemistry journal article supplement (doi:10.1039/c3tc32430c), 2014-01-01
Supplement: c3tc32430c1.pdf [file c3tc32430c1.pdf]

Supplementary Information

**Enhancing the efficiency of the opto-electronic devices by the cathode modification**

Ye Eun Ha,<sup>a</sup> Gyeong Eun Lim,<sup>a</sup> Mi Young Jo,<sup>a</sup> Juyun Park,<sup>b</sup> Yong-Cheol Kang,<sup>b</sup> Sang-Jin Moon<sup>c</sup> and

Joo Hyun Kim<sup>a,\*</sup>

<sup>a</sup>Department of Polymer Engineering and <sup>b</sup>Department of Chemistry, Pukyong National University,  
Busan 608-739, Korea.

<sup>c</sup>Energy Materials Research Center, Korea Research Institute of Chemical Technology (KRICT),  
Daejeon, 305-600, Korea

\*Corresponding author e-mail: [jkim@pknu.ac.kr](mailto:jkim@pknu.ac.kr)

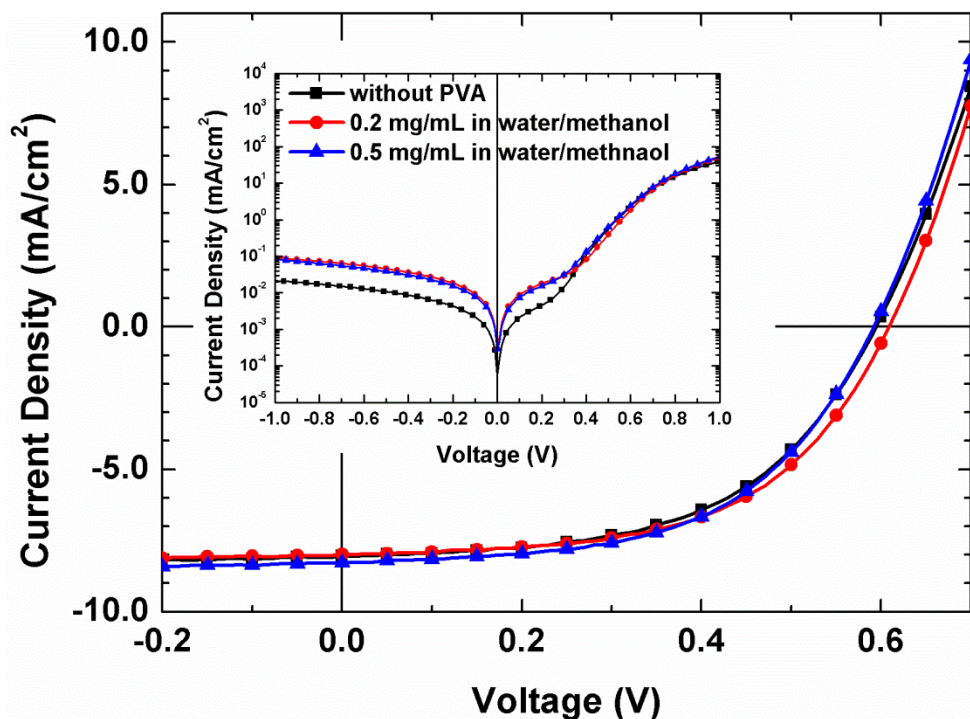

Fig. S1. Current density–voltage curves of PSCs under AM 1.5G simulated illumination with an intensity of  $100 \text{ mW/cm}^2$  and under the dark condition (inset) without PVA (square) and with the PVA film (circle) prepared from a concentration of  $0.2 \text{ mg/mL}$  solution in water/methanol (2/8 by volume) mixed solvent, and  $0.5 \text{ mg/mL}$  solution in water/methanol (2/8 by volume) mixed solvent.

Table S1. The photovoltaic parameters of PSCs with the best PCE value. The averages for photovoltaic parameters of each device are given in parentheses with mean variation.

|                       | $V_{oc}$ (V)                 | $J_{sc}$ ( $\text{mA/cm}^2$ ) | FF (%)                      | PCE (%)                     | $R_s$ ( $\Omega \cdot \text{cm}^2$ ) <sup>a</sup> | $R_p$ ( $\text{k}\Omega \cdot \text{cm}^2$ ) <sup>b</sup> |
|-----------------------|------------------------------|-------------------------------|-----------------------------|-----------------------------|---------------------------------------------------|-----------------------------------------------------------|
| w/o PVA               | 0.59<br>( $0.59 \pm 0.004$ ) | -8.04<br>( $-7.89 \pm 0.19$ ) | 54.0<br>( $54.7 \pm 0.89$ ) | 2.58<br>( $2.55 \pm 0.03$ ) | 5.34                                              | 46.51                                                     |
| $0.2 \text{ mg/mL}^c$ | 0.61<br>( $0.61 \pm 0.01$ )  | -7.98<br>( $-8.02 \pm 0.05$ ) | 55.4<br>( $55.0 \pm 0.4$ )  | 2.70<br>( $2.70 \pm 0.01$ ) | 3.14                                              | 11.05                                                     |
| $0.5 \text{ mg/mL}^c$ | 0.59<br>( $0.59 \pm 0.01$ )  | -8.28<br>( $-8.27 \pm 0.02$ ) | 54.6<br>( $54.1 \pm 0.5$ )  | 2.67<br>( $2.64 \pm 0.03$ ) | 2.98                                              | 12.36                                                     |

a: the series resistance (estimated from the device with the best PCE value).

b: the parallel resistance (estimated from the device with the best PCE value).

c: the PVA layer prepared from the solution in water/methanol (2/8 by volume).

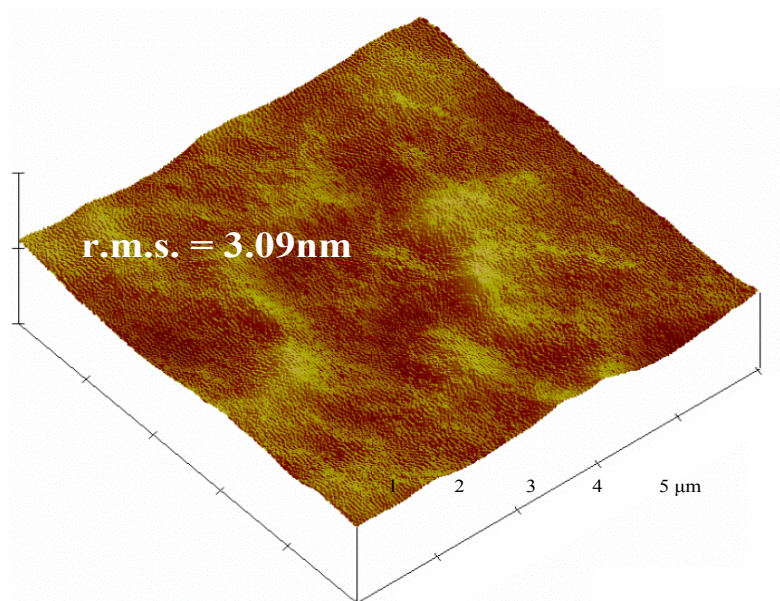

Fig. S2. AFM topography of the active layer with the PVA film spin-coated from a concentration of 0.5 mg/mL in methanol/water mixed solvent.

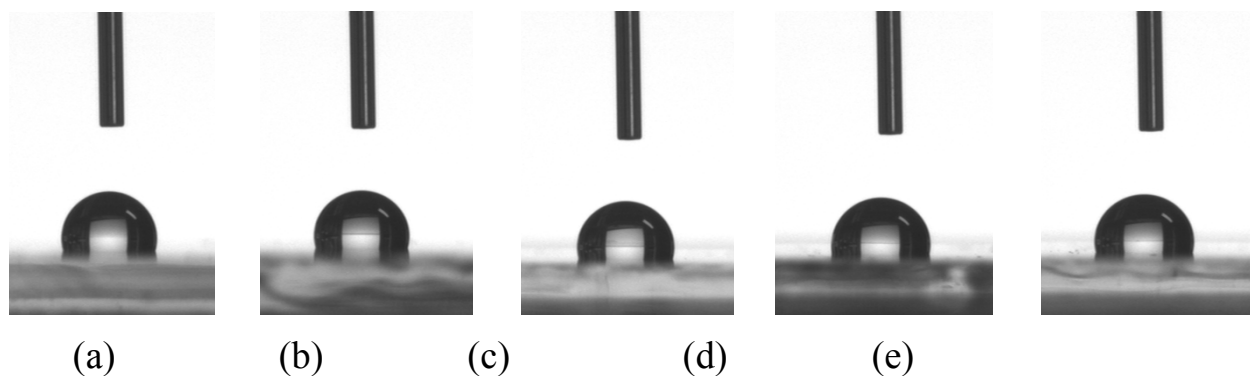

Fig. S3. The contact angle of the active layer (a) without PVA, with the PVA film prepared (b) from a concentration of 0.5 mg/mL in water/methanol (2/8 by volume) mixed solvent, (c) from a concentration of 0.2 mg/mL in DMSO/methanol (5/95 by volume) mixed solvent, (d) from a concentration of 0.5 mg/mL in DMSO/methanol (5/95 by volume) mixed solvent, and (e) from a concentration of 1.0 mg/mL in DMSO/methanol (5/95 by volume) mixed solvent.

Table S3. The summary of the surface energy of the active layer with and without the PVA film.

|                                     | without PVA | 0.5 mg/ml<br>PVA solution<br>in<br>water/methanol | 0.2 mg/ml PVA<br>solution in<br>DMSO/methanol | 0.5 mg/ml PVA<br>solution in<br>DMSO/methanol | 1.0 mg/ml PVA<br>solution in<br>DMSO/methanol |
|-------------------------------------|-------------|---------------------------------------------------|-----------------------------------------------|-----------------------------------------------|-----------------------------------------------|
| H <sub>2</sub> O drop               | 107.09      | 106.16                                            | 104.83                                        | 104.12                                        | 104.02                                        |
| CH <sub>2</sub> I <sub>2</sub> drop | 69.56       | 69.19                                             | 63.32                                         | 63.87                                         | 63.91                                         |
| $\gamma^d$                          | 23.43       | 23.43                                             | 27.14                                         | 26.62                                         | 26.62                                         |
| $\gamma^p$                          | 0.14        | 0.21                                              | 0.1                                           | 0.18                                          | 0.18                                          |
| $\gamma$                            | <b>23.6</b> | <b>24.0</b>                                       | <b>27.2</b>                                   | <b>26.8</b>                                   | <b>26.8</b>                                   |

$\gamma^d$  : dispersion term of surface energy  $\gamma^p$  : polar term of surface energy  $\gamma$  : total of surface energy
